# Supplementary material for: Characterization of Substrate Preference for Slc1p and Cst26p in Saccharomyces cerevisiae Using Lipidomic Approaches and an LPAAT Activity Assay
Source: PubMed Central journal article supplement (PMC2915916; doi:10.1371/journal.pone.0011956), 2010-08-04
Supplement: pone.0011956.s001.pdf [file pone.0011956.s001.pdf]

Table S1

| PG           | [M-H] <sup>+</sup> →FA | PE           | [M-H] <sup>+</sup> →FA | PC           | [M+C] <sup>+</sup> →FA | PC           | [M-H] <sup>+</sup> →FA | PI           | [M-H] <sup>+</sup> →FA | PS           | [M-H] <sup>+</sup> →FA | PA           | [M-H] <sup>+</sup> →FA |
|--------------|------------------------|--------------|------------------------|--------------|------------------------|--------------|------------------------|--------------|------------------------|--------------|------------------------|--------------|------------------------|
| PG-18:0/18:1 | 775.6→283.2            | PE-18:0/18:1 | 744.6→283.2            | PC-18:0/18:1 | 822.6→283.2            | PC-18:1/18:0 | 772.5→281.2            | PI-18:0/16:1 | 835.6→283.2            | PS-18:0/16:1 | 760.6→283.2            | PA-18:0/16:1 | 673.6→283.2            |
| PG-18:0/16:0 | 749.6→283.2            | PE-18:0/16:0 | 718.6→283.2            | PC-18:0/16:0 | 796.6→283.2            | PC-18:0/16:0 | 746.6→283.2            | PI-18:0/16:0 | 837.6→283.2            | PS-18:0/16:0 | 762.6→283.2            | PA-18:0/16:0 | 675.6→283.2            |
| PG-18:0/16:1 | 747.6→283.2            | PE-18:0/16:1 | 716.6→283.2            | PC-18:0/16:1 | 794.6→283.2            | PC-18:0/16:1 | 744.6→283.2            | PI-18:0/16:1 | 835.6→283.2            | PS-18:0/16:1 | 760.6→283.2            | PA-18:0/16:1 | 673.6→283.2            |
| PG-18:0/14:0 | 721.6→283.2            | PE-18:0/14:0 | 690.5→283.2            | PC-18:0/14:0 | 768.5→283.2            | PC-18:0/14:0 | 718.5→283.2            | PI-18:0/14:0 | 809.6→283.2            | PS-18:0/14:0 | 734.6→283.2            | PA-18:0/14:0 | 647.6→283.2            |
| PG-18:0/14:1 | 719.6→283.2            | PE-18:0/14:1 | 688.5→283.2            | PC-18:0/14:1 | 766.5→283.2            | PC-18:0/14:1 | 716.5→283.2            | PI-18:0/14:1 | 807.6→283.2            | PS-18:0/14:1 | 732.6→283.2            | PA-18:0/14:1 | 645.6→283.2            |
| PG-18:0/12:0 | 693.5→283.2            | PE-18:0/12:0 | 662.5→283.2            | PC-18:0/12:0 | 740.5→283.2            | PC-18:0/12:0 | 690.5→283.2            | PI-18:0/12:0 | 781.6→283.2            | PS-18:0/12:0 | 706.6→283.2            | PA-18:0/12:0 | 619.6→283.2            |
| PG-18:0/12:1 | 691.5→283.2            | PE-18:0/12:1 | 660.5→283.2            | PC-18:0/12:1 | 738.5→283.2            | PC-18:0/12:1 | 688.5→283.2            | PI-18:0/12:1 | 779.6→283.2            | PS-18:0/12:1 | 704.6→283.2            | PA-18:0/12:1 | 617.6→283.2            |
| PG-18:0/10:0 | 665.5→281.1            | PE-18:0/10:0 | 634.5→283.2            | PC-18:0/10:0 | 712.5→283.2            | PC-18:0/10:0 | 662.5→283.2            | PI-18:0/10:0 | 753.6→283.2            | PS-18:0/10:0 | 678.6→283.2            | PA-18:0/10:0 | 591.6→283.2            |
| PG-18:0/10:1 | 663.5→281.1            | PE-18:0/10:1 | 632.5→283.2            | PC-18:0/10:1 | 710.5→283.2            | PC-18:0/10:1 | 660.5→283.2            | PI-18:0/10:1 | 751.6→283.2            | PS-18:0/10:1 | 676.6→283.2            | PA-18:0/10:1 | 589.6→283.2            |
| PG-18:0/8:0  | 637.5→281.1            | PE-18:0/8:0  | 606.5→283.2            | PC-18:0/8:0  | 684.5→283.2            | PC-18:0/8:0  | 634.5→283.2            | PI-18:0/8:0  | 725.6→283.2            | PS-18:0/8:0  | 650.6→283.2            | PA-18:0/8:0  | 563.6→283.2            |
| PG-18:1/18:1 | 773.5→281.1            | PE-18:1/18:0 | 744.5→281.2            | PC-18:0/18:1 | 772.6→283.2            | PC-18:1/18:0 | 772.5→281.2            | PI-18:1/18:0 | 863.6→281.2            | PS-18:1/18:0 | 788.6→281.2            | PA-18:1/18:0 | 701.6→281.2            |
| PG-18:1/16:0 | 747.5→281.1            | PE-18:1/18:1 | 742.5→281.2            | PC-18:1/18:1 | 820.5→281.2            | PC-18:1/18:1 | 770.5→281.2            | PI-18:1/18:1 | 861.6→281.2            | PS-18:1/18:1 | 786.6→281.2            | PA-18:1/18:1 | 699.6→281.2            |
| PG-18:1/16:1 | 745.5→281.1            | PE-18:1/16:0 | 716.5→281.2            | PC-18:1/16:0 | 794.5→281.2            | PC-18:1/16:0 | 744.5→281.2            | PI-18:1/16:0 | 835.6→281.2            | PS-18:1/16:0 | 760.6→281.2            | PA-18:1/16:0 | 673.6→281.2            |
| PG-18:1/14:0 | 719.6→281.1            | PE-18:1/16:1 | 714.5→281.2            | PC-18:1/16:1 | 792.5→281.2            | PC-18:1/16:1 | 742.5→281.2            | PI-18:1/16:1 | 833.6→281.2            | PS-18:1/16:1 | 758.6→281.2            | PA-18:1/16:1 | 671.6→281.2            |
| PG-18:1/14:1 | 717.6→281.1            | PE-18:1/14:0 | 688.5→281.2            | PC-18:1/14:0 | 766.5→281.2            | PC-18:1/14:0 | 716.5→281.2            | PI-18:1/14:0 | 807.5→281.2            | PS-18:1/14:0 | 732.5→281.2            | PA-18:1/14:0 | 645.5→281.2            |
| PG-18:1/12:0 | 691.6→281.1            | PE-18:1/14:1 | 686.5→281.2            | PC-18:1/14:1 | 764.5→281.2            | PC-18:1/14:1 | 714.5→281.2            | PI-18:1/14:1 | 805.5→281.2            | PS-18:1/14:1 | 730.5→281.2            | PA-18:1/14:1 | 643.5→281.2            |
| PG-18:1/12:1 | 689.6→281.1            | PE-18:1/12:0 | 660.5→281.2            | PC-18:1/12:0 | 738.5→281.2            | PC-18:1/12:0 | 688.5→281.2            | PI-18:1/12:0 | 779.5→281.2            | PS-18:1/12:0 | 704.5→281.2            | PA-18:1/12:0 | 617.5→281.2            |
| PG-18:1/10:0 | 663.6→281.1            | PE-18:1/12:1 | 658.5→281.2            | PC-18:1/12:1 | 736.5→281.2            | PC-18:1/12:1 | 686.5→281.2            | PI-18:1/12:1 | 777.5→281.2            | PS-18:1/12:1 | 702.5→281.2            | PA-18:1/12:1 | 615.5→281.2            |
| PG-18:1/10:1 | 661.6→281.1            | PE-18:1/10:0 | 632.5→281.2            | PC-18:1/10:0 | 710.5→281.2            | PC-18:1/10:0 | 660.5→281.2            | PI-18:1/10:0 | 751.5→281.2            | PS-18:1/10:0 | 676.5→281.2            | PA-18:1/10:0 | 589.5→281.2            |
| PG-18:1/8:0  | 635.6→281.1            | PE-18:1/10:1 | 630.5→281.2            | PC-18:1/10:1 | 708.5→281.2            | PC-18:1/10:1 | 658.5→281.2            | PI-18:1/10:1 | 749.5→281.2            | PS-18:1/10:1 | 674.5→281.2            | PA-18:1/10:1 | 587.5→281.2            |
| PG-16:0/18:0 | 749.5→255.1            | PE-18:1/8:0  | 604.5→281.2            | PC-18:1/8:0  | 682.5→281.2            | PC-18:1/8:0  | 632.5→281.2            | PI-18:1/8:0  | 723.5→281.2            | PS-18:1/8:0  | 648.5→281.2            | PA-18:1/8:0  | 561.5→281.2            |
| PG-16:0/18:1 | 747.5→255.1            | PE-16:0/16:0 | 690.5→255.2            | PC-16:0/18:1 | 794.5→255.2            | PC-16:0/18:1 | 744.5→255.2            | PI-16:0/18:1 | 835.6→255.1            | PS-16:0/18:1 | 760.6→255.2            | PA-16:0/18:1 | 673.6→255.2            |
| PG-16:0/16:0 | 721.5→255.1            | PE-16:0/18:1 | 716.5→255.2            | PC-16:0/16:0 | 768.5→255.2            | PC-16:0/16:0 | 718.5→255.2            | PI-16:0/16:0 | 809.6→255.1            | PS-16:0/16:0 | 734.6→255.2            | PA-16:0/16:0 | 647.6→255.2            |
| PG-16:0/16:1 | 719.5→255.1            | PE-16:0/16:1 | 688.5→255.2            | PC-16:0/16:1 | 766.5→255.2            | PC-16:0/16:1 | 716.5→255.2            | PI-16:0/16:1 | 807.6→255.1            | PS-16:0/16:1 | 732.6→255.2            | PA-16:0/16:1 | 645.6→255.2            |
| PG-16:0/14:0 | 693.5→255.1            | PE-16:0/14:0 | 662.5→255.2            | PC-16:0/14:0 | 740.5→255.2            | PC-16:0/14:0 | 690.5→255.2            | PI-16:0/14:0 | 781.5→255.1            | PS-16:0/14:0 | 706.5→255.2            | PA-16:0/14:0 | 619.5→255.2            |
| PG-16:0/14:1 | 691.5→255.1            | PE-16:0/14:1 | 660.5→255.2            | PC-16:0/14:1 | 738.5→255.2            | PC-16:0/14:1 | 688.5→255.2            | PI-16:0/14:1 | 779.5→255.1            | PS-16:0/14:1 | 704.5→255.2            | PA-16:0/14:1 | 617.5→255.2            |
| PG-16:0/12:0 | 665.5→255.1            | PE-16:0/12:0 | 634.5→255.2            | PC-16:0/12:0 | 712.5→255.2            | PC-16:0/12:0 | 662.5→255.2            | PI-16:0/12:0 | 753.5→255.1            | PS-16:0/12:0 | 678.5→255.2            | PA-16:0/12:0 | 591.5→255.2            |
| PG-16:0/12:1 | 663.5→255.1            | PE-16:0/12:1 | 632.5→255.2            | PC-16:0/12:1 | 710.5→255.2            | PC-16:0/12:1 | 660.5→255.2            | PI-16:0/12:1 | 751.5→255.1            | PS-16:0/12:1 | 676.5→255.2            | PA-16:0/12:1 | 589.5→255.2            |
| PG-16:0/10:0 | 637.5→255.1            | PE-16:0/10:0 | 606.5→255.2            | PC-16:0/10:0 | 684.5→255.2            | PC-16:0/10:0 | 634.5→255.2            | PI-16:0/10:0 | 725.5→255.1            | PS-16:0/10:0 | 650.5→255.2            | PA-16:0/10:0 | 563.5→255.2            |
| PG-16:0/10:1 | 635.5→255.1            | PE-16:0/10:1 | 604.5→255.2            | PC-16:0/10:1 | 682.5→255.2            | PC-16:0/10:1 | 632.5→255.2            | PI-16:0/10:1 | 723.5→255.1            | PS-16:0/10:1 | 648.5→255.2            | PA-16:0/10:1 | 561.5→255.2            |
| PG-16:0/8:0  | 609.5→255.1            | PE-16:0/8:0  | 578.5→255.2            | PC-16:0/8:0  | 656.5→255.2            | PC-16:0/8:0  | 606.5→255.2            | PI-16:0/8:0  | 697.5→255.1            | PS-16:0/8:0  | 622.5→255.2            | PA-16:0/8:0  | 535.5→255.2            |
| PG-16:1/18:0 | 747.5→253.1            | PE-16:1/18:0 | 716.5→253.1            | PC-16:1/18:0 | 794.5→253.1            | PC-16:1/18:0 | 744.5→253.1            | PI-16:1/18:0 | 835.5→253.1            | PS-16:1/18:0 | 760.5→253.2            | PA-16:1/18:0 | 673.5→253.2            |
| PG-16:1/18:1 | 745.5→253.1            | PE-16:1/18:1 | 714.5→253.1            | PC-16:1/18:1 | 792.5→253.1            | PC-16:1/18:1 | 742.5→253.1            | PI-16:1/18:1 | 833.5→253.1            | PS-16:1/18:1 | 758.5→253.2            | PA-16:1/18:1 | 671.5→253.2            |
| PG-16:1/16:0 | 719.5→253.1            | PE-16:1/16:0 | 688.5→253.1            | PC-16:1/16:0 | 766.5→253.1            | PC-16:1/16:0 | 716.5→253.1            | PI-16:1/16:0 | 807.5→253.1            | PS-16:1/16:0 | 732.5→253.2            | PA-16:1/16:0 | 645.5→253.2            |
| PG-16:1/16:1 | 717.5→253.1            | PE-16:1/16:1 | 686.5→253.1            | PC-16:1/16:1 | 764.5→253.1            | PC-16:1/16:1 | 714.5→253.1            | PI-16:1/16:1 | 805.5→253.1            | PS-16:1/16:1 | 730.5→253.2            | PA-16:1/16:1 | 643.5→253.2            |
| PG-16:1/14:0 | 691.5→253.1            | PE-16:1/14:0 | 660.5→253.1            | PC-16:1/14:0 | 738.5→253.1            | PC-16:1/14:0 | 688.5→253.1            | PI-16:1/14:0 | 779.5→253.1            | PS-16:1/14:0 | 704.5→253.2            | PA-16:1/14:0 | 617.5→253.2            |
| PG-16:1/14:1 | 689.5→253.1            | PE-16:1/14:1 | 658.5→253.1            | PC-16:1/14:1 | 736.5→253.1            | PC-16:1/14:1 | 686.5→253.1            | PI-16:1/14:1 | 777.5→253.1            | PS-16:1/14:1 | 702.5→253.2            | PA-16:1/14:1 | 615.5→253.2            |
| PG-16:1/12:0 | 663.5→253.1            | PE-16:1/12:0 | 632.5→253.1            | PC-16:1/12:0 | 710.5→253.1            | PC-16:1/12:0 | 660.5→253.1            | PI-16:1/12:0 | 751.5→253.1            | PS-16:1/12:0 | 676.5→253.2            | PA-16:1/12:0 | 589.5→253.2            |
| PG-16:1/12:1 | 661.5→253.1            | PE-16:1/12:1 | 630.5→253.1            | PC-16:1/12:1 | 708.5→253.1            | PC-16:1/12:1 | 658.5→253.1            | PI-16:1/12:1 | 749.5→253.1            | PS-16:1/12:1 | 674.5→253.2            | PA-16:1/12:1 | 587.5→253.2            |
| PG-16:1/10:0 | 635.5→253.1            | PE-16:1/10:0 | 604.5→253.1            | PC-16:1/10:0 | 682.5→253.1            | PC-16:1/10:0 | 632.5→253.1            | PI-16:1/10:0 | 723.5→253.1            | PS-16:1/10:0 | 648.5→253.2            | PA-16:1/10:0 | 561.5→253.2            |
| PG-16:1/10:1 | 633.5→253.1            | PE-16:1/10:1 | 602.5→253.1            | PC-16:1/10:1 | 680.5→253.1            | PC-16:1/10:1 | 630.5→253.1            | PI-16:1/10:1 | 721.5→253.1            | PS-16:1/10:1 | 646.5→253.2            | PA-16:1/10:1 | 559.5→253.2            |
| PG-16:1/8:0  | 607.5→253.1            | PE-16:1/8:0  | 576.5→255.2            | PC-16:1/8:0  | 654.5→255.2            | PC-16:1/8:0  | 604.5→255.2            | PI-16:1/8:0  | 695.5→253.1            | PS-16:1/8:0  | 620.5→253.2            | PA-16:1/8:0  | 533.5→253.2            |
| PG-14:0/18:0 | 721.6→227.1            | PE-14:0/18:1 | 688.5→227.1            | PC-14:0/18:1 | 766.5→227.1            | PC-14:0/18:1 | 716.5→227.1            | PI-14:0/18:1 | 807.5→227.1            | PS-14:0/18:1 | 732.5→227.1            | PA-14:0/18:1 | 645.5→227.1            |
| PG-14:0/18:1 | 719.6→227.1            | PE-14:0/16:1 | 660.5→227.1            | PC-14:0/18:1 | 738.5→227.1            | PC-14:0/16:1 | 688.5→227.1            | PI-14:0/16:1 | 781.5→227.1            | PS-14:0/16:1 | 706.5→227.1            | PA-14:0/16:1 | 619.5→227.1            |
| PG-14:0/16:0 | 693.5→227.1            | PE-14:0/14:0 | 634.5→227.1            | PC-14:0/14:0 | 712.5→227.1            | PC-14:0/14:0 | 662.5→227.1            | PI-14:0/14:0 | 779.5→227.1            | PS-14:0/14:0 | 704.5→227.1            | PA-14:0/14:0 | 617.5→227.1            |
| PG-14:0/16:1 | 691.5→227.1            | PE-14:0/14:1 | 632.5→227.1            | PC-14:0/14:1 | 710.5→227.1            | PC-14:0/14:1 | 660.5→227.1            | PI-14:0/14:0 | 753.5→227.1            | PS-14:0/14:0 | 678.5→227.1            | PA-14:0/14:0 | 591.5→227.1            |
| PG-14:0/14:0 | 665.5→227.1            | PE-14:0/12:0 | 606.5→227.1            | PC-14:0/12:0 | 684.5→227.1            | PC-14:0/12:0 | 634.5→227.1            | PI-14:0/14:1 | 751.5→227.1            | PS-14:0/14:1 | 676.5→227.1            | PA-14:0/14:1 | 589.5→227.1            |
| PG-14:0/14:1 | 663.5→227.1            | PE-14:0/12:1 | 604.5→227.1            | PC-14:0/12:1 | 682.5→227.1            | PC-14:0/12:1 | 632.5→227.1            | PI-14:0/12:0 | 725.5→227.1            | PS-14:0/12:0 | 650.5→227.1            | PA-14:0/12:0 | 563.5→227.1            |
| PG-14:0/12:0 | 637.5→227.1            | PE-14:0/10:0 | 578.5→227.1            | PC-14:0/10:0 | 656.5→227.1            | PC-14:0/10:0 | 606.5→227.1            | PI-14:0/12:1 | 723.5→227.1            | PS-14:0/12:1 | 648.5→227.1            | PA-14:0/12:1 | 561.5→227.1            |
| PG-14:0/12:1 | 635.5→227.1            | PE-14:0/10:1 | 576.5→227.1            | PC-14:0/10:1 | 654.5→227.1            | PC-14:0/10:1 | 604.5→227.1            | PI-14:0/10:0 | 697.5→227.1            | PS-14:0/10:0 | 622.5→227.1            | PA-14:0/10:0 | 535.5→227.1            |
| PG-14:0/10:0 | 609.5→227.1            | PE-14:0/8:0  | 550.5→227.1            | PC-14:0/8:0  | 628.5→227.1            | PC-14:0/8:0  | 578.5→227.1            | PI-14:0/10:1 | 695.5→227.1            | PS-14:0/10:1 | 620.5→227.1            | PA-14:0/10:1 | 533.5→227.1            |
| PG-14:0/10:1 | 607.5→227.1            | PE-14:1/18:0 | 688.5→225.1            | PC-14:1/18:0 | 766.5→225.1            | PC-14:1/18:0 | 716.5→225.1            | PI-14:0/8:0  | 669.5→227.1            | PS-14:0/8:0  | 594.5→227.1            | PA-14:0/8:0  | 507.5→227.1            |
| PG-14:0/8:0  | 581.5→227.1            | PE-14:1/18:1 | 686.5→225.1            | PC-14:1/18:1 | 764.5→225.1            | PC-14:1/18:1 | 714.5→225.1            | PI-14:1/18:0 | 807.6→225.1            | PS-14:1/18:0 | 732.6→225.1            | PA-14:1/18:0 | 645.6→225.1            |
| PG-12:0/12:0 | 609.5→199.1</          |              |                        |              |                        |              |                        |              |                        |              |                        |              |                        |
