# Supplementary material for: Characterization of Substrate Preference for Slc1p and Cst26p in Saccharomyces cerevisiae Using Lipidomic Approaches and an LPAAT Activity Assay
Source: PubMed Central journal article supplement (PMC2915916; doi:10.1371/journal.pone.0011956), 2010-08-04

# Figure S2

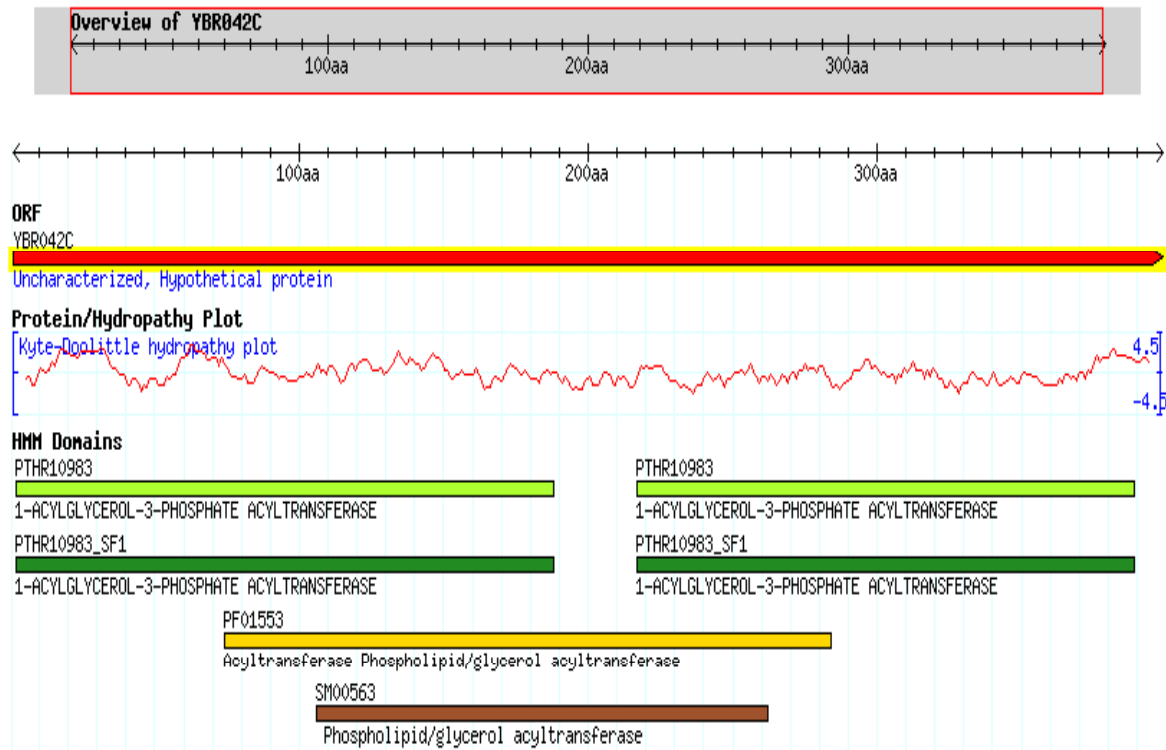

Supplement: pone.0011956.s003.pdf [file pone.0011956.s003.pdf]
